# Supplementary material for: Efficacy and Safety of Analgesic Treatment for Depression in People with Advanced Dementia: Randomised, Multicentre, Double-Blind, Placebo-Controlled Trial (DEP.PAIN.DEM)
Source: PubMed Central journal article supplement — Drugs Aging. 2018 May 3;35(6):545–58. doi: 10.1007/s40266-018-0546-2 (PMC5999156; doi:10.1007/s40266-018-0546-2), 2018-05-03
Supplement: 40266_2018_546_MOESM1_ESM.pdf [file 40266_2018_546_MOESM1_ESM.pdf]

**Efficacy and safety of analgesic treatment for depression in people with advanced dementia:  
randomised, multicentre, double-blind, placebo-controlled trial (DEP.PAIN.DEM)**

Ane Erdal<sup>1\*</sup>, Elisabeth Flo<sup>2</sup>, Dag Aarsland<sup>3</sup>, Clive Ballard<sup>4</sup>, Dagrund D. Slettebo<sup>1</sup>, Bettina S. Husebo<sup>1,5</sup>

<sup>1</sup>Department of Global Public Health and Primary Care, Centre for Elderly and Nursing Home Medicine, University of Bergen, Bergen, Norway, <sup>2</sup>Department of Clinical Psychology, University of Bergen, Bergen, Norway, <sup>3</sup>Department of Old Age Psychiatry, Institute of Psychiatry, Psychology and Neuroscience, King's College London, London, United Kingdom, <sup>4</sup>University of Exeter, Exeter, United Kingdom, <sup>5</sup>Department of Health and Care, Municipality of Bergen, Norway

**ELECTRONIC SUPPLEMENTARY MATERIAL**

**Drugs & Aging**

\*Corresponding author;

E-mail: [ane.erdal@uib.no](mailto:ane.erdal@uib.no)

Phone: 0047 4815 5671

ORCID: 0000-0003-3802-7383 (AE)

# MOBID-2 Pain Scale

MOBILIZATION – OBSERVATION – BEHAVIOUR – INTENSITY – DEMENTIA

Patient's name:

Date:

Time:

Unit:

Pay attention to the patient's pain behaviour during morning care. Observe the patient before you start mobilization. Explain clearly what is going to happen. Guide the patient carefully through the activities 1–5. Reverse the movement immediately if pain behaviour is perceived. Rate your observation after each activity:

## Pain Behaviour

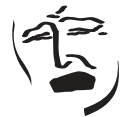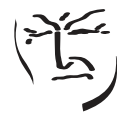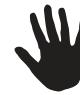

Tick the boxes for Pain noises, Facial expression and Defence, whenever you observed such pain behaviour

### Pain noises

Ouch!  
Groaning  
Gasping  
Screaming

### Facial expression

Grimacing  
Frowning  
Tightening mouth  
Closing eyes

### Defence

Freezing  
Guarding  
Pushing  
Crouching

## Pain Intensity

Based on pain behaviour, rate the pain intensity with a cross on the lines (0–10)

YOU MAY TICK SEVERAL BOXES FOR EACH ACTIVITY

HOW INTENSE DO YOU REGARD THE PAIN TO BE?  
0 is no pain and 10 is as bad as it possibly could be

1. Guide to open both hands, one hand at a time



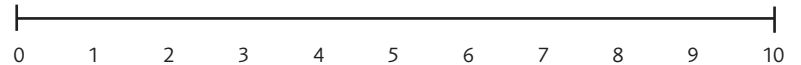

2. Guide to stretch both arms towards head, one arm at a time



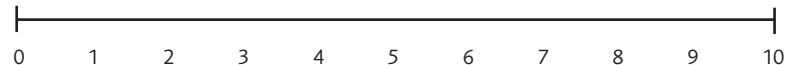

3. Guide to stretch and bend both knees and hips, one leg at a time



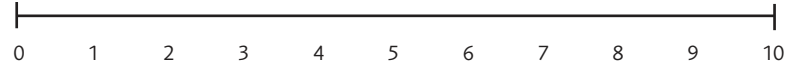

4. Guide to turn in bed to both sides



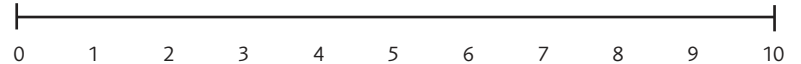

5. Guide to sit at the bedside



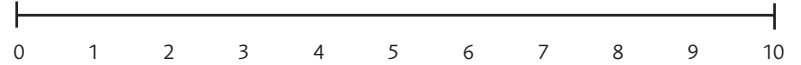

Did you observe, today or in the last days (one week), that the patient expressed pain behaviour related to head, internal organs and/or skin, which may be caused by a disease, wound, infection and/or injury?

## Pain Behaviour

Make one or more cross/es on the pain drawing (front and back), according to observed pain behaviour (Pain noises, Facial expression and Defence)

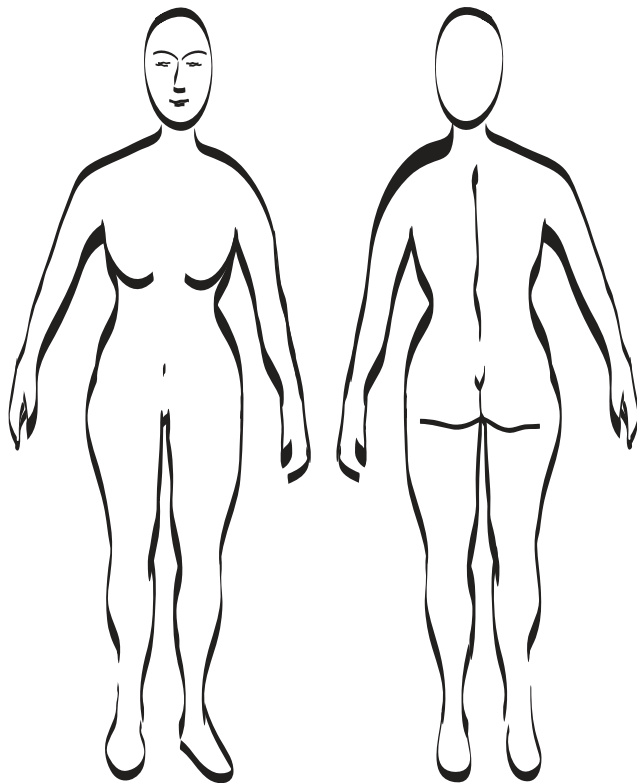

6. Head, mouth, neck

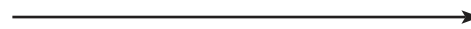

7. Heart, lung, chest wall

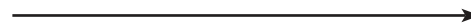

8. Abdomen

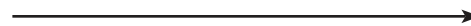

9. Pelvis, genital organs

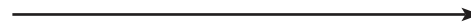

10. Skin

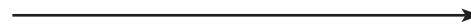

## Pain Intensity

Based on pain behaviour, rate the pain intensity with a cross on the lines (0–10)

HOW INTENSE DO YOU REGARD THE PAIN TO BE?

0 is no pain and 10 is as bad as it possibly could be

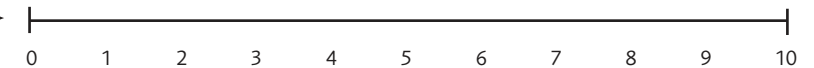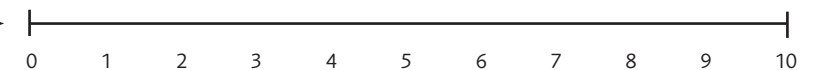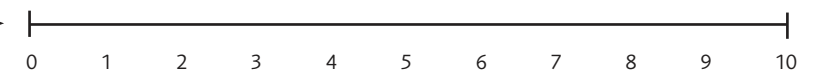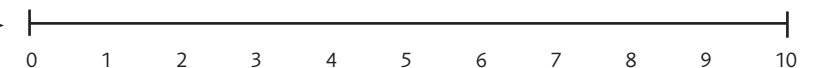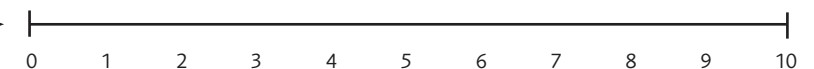

Based on all observations, rate the patient's overall pain intensity

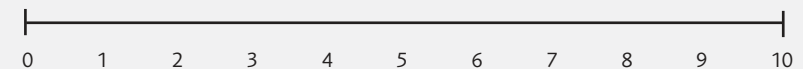

**Online Resource 2. Estimated effect of active analgesic treatment on CSDD depressive symptoms compared to placebo; all coefficients from mixed model analysis.**

|                              | <u>Change from baseline to 13 weeks</u> |                                       |                                    | <u>Change from baseline to 6 weeks</u> |                        |                              | <u>Change from 6 weeks to 13 weeks</u> |                        |                              | P-int | ICC NH | ICC pat |
|------------------------------|-----------------------------------------|---------------------------------------|------------------------------------|----------------------------------------|------------------------|------------------------------|----------------------------------------|------------------------|------------------------------|-------|--------|---------|
|                              | Placebo<br>(95% CI)                     | Active<br>(95% CI)                    | Treatment effect<br>(95% CI)       | Placebo<br>(95% CI)                    | Active<br>(95% CI)     | Treatment effect<br>(95% CI) | Placebo<br>(95% CI)                    | Active<br>(95% CI)     | Treatment effect<br>(95% CI) |       |        |         |
| All patients                 | <b>-3.30</b><br><b>(-4.68, -1.92)</b>   | -0.66<br>(-2.27, 0.94)                | <b>2.64</b><br><b>(0.55, 4.72)</b> | <b>-1.67</b><br><b>(-2.86, -0.47)</b>  | -0.92<br>(-2.24, 0.40) | 0.74<br>(-1.03, 2.52)        | <b>-1.64</b><br><b>(-3.06, -0.21)</b>  | 0.26<br>(-1.41, 1.93)  | 1.89<br>(-0.29, 4.08)        | 0.05  | 0.14   | 0.25    |
| MMSE 11-20                   | -2.37<br>(-4.75, 0.00)                  | -0.13<br>(-2.68, 2.42)                | 2.24<br>(-1.24, 5.72)              | -0.34<br>(-2.32, 1.64)                 | -0.01<br>(-2.03, 2.02) | 0.33<br>(-2.50, 3.16)        | -2.03<br>(-4.75, 0.68)                 | -0.12<br>(-3.00, 2.75) | 1.91<br>(-2.05, 5.86)        | 0.44  | 0.20   | 0.21    |
| MMSE 0-10                    | <b>-3.55</b><br><b>(-5.21, -1.88)</b>   | <b>-2.45</b><br><b>(-4.47, -0.42)</b> | 1.10<br>(-1.49, 3.69)              | <b>-2.21</b><br><b>(-3.76, -0.66)</b>  | -1.65<br>(-3.36, 0.07) | 0.56<br>(-1.75, 2.86)        | -1.34<br>(-3.13, 0.45)                 | -0.80<br>(-2.98, 1.38) | 0.54<br>(-2.27, 3.35)        | 0.69  | 0.27   | 0.28    |
| Paracetamol                  | <b>-3.04</b><br><b>(-4.93, -1.15)</b>   | -1.06<br>(-3.09, 0.97)                | 1.98<br>(-0.79, 4.74)              | <b>-2.13</b><br><b>(-4.07, -0.18)</b>  | -1.73<br>(-3.73, 0.27) | 0.40<br>(-2.39, 3.18)        | -0.91<br>(-3.02, 1.19)                 | 0.67<br>(-1.57, 2.90)  | 1.58<br>(-1.49, 4.64)        | 0.35  | 0.27   | 0.27    |
| Buprenorphine                | <b>-3.44</b><br><b>(-5.39, -1.50)</b>   | -0.41<br>(-2.88, 2.07)                | 3.04<br>(-0.11, 6.19)              | -1.24<br>(-2.80, 0.31)                 | -0.28<br>(-2.12, 1.56) | 0.96<br>(-1.45, 3.37)        | <b>-2.20</b><br><b>(-4.12, -0.29)</b>  | -0.13<br>(-2.65, 2.39) | 2.07<br>(-1.06, 5.20)        | 0.85  | <0.01  | 0.21    |
| MOBID2 <3                    | <b>-2.64</b><br><b>(-4.83, -0.44)</b>   | 0.02<br>(-2.24, 2.27)                 | 2.65<br>(-0.49, 5.80)              | <b>-2.83</b><br><b>(-4.54, -1.12)</b>  | -1.41<br>(-3.12, 0.30) | 1.42<br>(-1.00, 3.83)        | 0.19<br>(-1.61, 2.00)                  | 1.43<br>(-0.49, 3.35)  | 1.24<br>(-1.40, 3.87)        | 0.09  | 0.18   | 0.26    |
| MOBID-2 ≥3                   | <b>-3.63</b><br><b>(-5.37, -1.89)</b>   | -1.38<br>(-3.57, 0.82)                | 2.25<br>(-0.55, 5.04)              | -1.03<br>(-2.62, 0.56)                 | -0.56<br>(-2.42, 1.30) | 0.47<br>(-1.98, 2.91)        | <b>-2.60</b><br><b>(-4.53, -0.66)</b>  | -0.82<br>(-3.23, 1.60) | 1.78<br>(-1.31, 4.88)        | 0.29  | 0.07   | 0.24    |
| MOBID-2 ≥3,<br>paracetamol   | -2.94<br>(-5.93, 0.04)                  | -1.32<br>(-4.43, 1.80)                | 1.63<br>(-2.68, 5.94)              | -1.29<br>(-4.21, 1.64)                 | -1.66<br>(-4.59, 1.26) | -0.38<br>(-4.51, 3.76)       | -1.66<br>(-4.81, 1.49)                 | 0.35<br>(-2.90, 3.59)  | 2.01<br>(-2.52, 6.53)        | 0.64  | 0.02   | 0.18    |
| MOBID-2 ≥3,<br>buprenorphine | <b>-3.91</b><br><b>(-5.94, -1.89)</b>   | -1.73<br>(-4.63, 1.18)                | 2.19<br>(-1.35, 5.73)              | -0.89<br>(-2.84, 1.06)                 | 0.42<br>(-2.10, 2.95)  | 1.32<br>(-1.87, 4.51)        | <b>-3.02</b><br><b>(-5.11, -0.93)</b>  | -2.15<br>(-5.22, 0.92) | 0.87<br>(-2.84, 4.58)        | 0.44  | <0.01  | 0.31    |

CSDD, Cornell Scale for Depression in Dementia; ICC NH, intraclass correlation on nursing home unit level; ICC pat, intraclass correlation on patient level; MMSE, Mini-Mental State Examination; MOBID-2, Mobilisation-Observation-Behaviour-Intensity-Dementia-2 Pain Scale; P-int, P for interaction, obtained by likelihood ratio test.

**Online Resource 3. Estimated effect of active analgesic treatment on MOBID-2 pain intensity compared to placebo; all coefficients from mixed model analysis.**

|                           | <u>Change from baseline to 13 weeks</u> |                                       |                           | <u>Change from baseline to 6 weeks</u> |                                       |                           | <u>Change from 6 weeks to 13 weeks</u> |                        |                                       | P-int | ICC NH | ICC pat |
|---------------------------|-----------------------------------------|---------------------------------------|---------------------------|----------------------------------------|---------------------------------------|---------------------------|----------------------------------------|------------------------|---------------------------------------|-------|--------|---------|
|                           | Placebo (95% CI)                        | Active (95% CI)                       | Treatment effect (95% CI) | Placebo (95% CI)                       | Active (95% CI)                       | Treatment effect (95% CI) | Placebo (95% CI)                       | Active (95% CI)        | Treatment effect (95% CI)             |       |        |         |
| All patients              | -0.09<br>(-0.63, 0.46)                  | -0.28<br>(-0.90, 0.35)                | -0.19<br>(-1.02, 0.64)    | -0.51<br>(-1.03, 0.00)                 | -0.32<br>(-0.92, 0.27)                | 0.19<br>(-0.59, 0.97)     | 0.43<br>(-0.13, 0.98)                  | 0.05<br>(-0.62, 0.72)  | -0.38<br>(-1.25, 0.49)                | 0.69  | 0.31   | 0.55    |
| MMSE 11-20                | 0.39<br>(-0.56, 1.34)                   | -0.63<br>(-1.69, 0.44)                | -1.01<br>(-2.44, 0.41)    | -0.42<br>(-1.34, 0.50)                 | -0.02<br>(-0.99, 0.95)                | 0.39<br>(-0.94, 1.73)     | 0.81<br>(-0.16, 1.77)                  | -0.60<br>(-1.65, 0.44) | -1.41<br>(-2.83, 0.01)                | 0.13  | 0.46   | 0.55    |
| MMSE 0-10                 | -0.23<br>(-0.97, 0.50)                  | -0.11<br>(-0.99, 0.76)                | 0.12<br>(-1.02, 1.26)     | -0.39<br>(-1.08, 0.30)                 | -0.37<br>(-1.20, 0.47)                | 0.03<br>(-1.05, 1.11)     | 0.16<br>(-0.59, 0.91)                  | 0.25<br>(-0.72, 1.23)  | 0.09<br>(-1.13, 1.32)                 | 0.98  | 0.17   | 0.56    |
| Paracetamol               | 0.31<br>(-0.36, 0.99)                   | -0.66<br>(-1.43, 0.11)                | -0.98<br>(-2.00, 0.05)    | -0.23<br>(-0.88, 0.42)                 | -0.09<br>(-0.80, 0.62)                | 0.14<br>(-0.83, 1.10)     | 0.54<br>(-0.14, 1.23)                  | -0.57<br>(-1.37, 0.22) | <b>-1.11</b><br><b>(-2.16, -0.06)</b> | 0.08  | <0.01  | 0.70    |
| Buprenorphine             | -0.40<br>(-1.20, 0.40)                  | 0.07<br>(-0.88, 1.01)                 | 0.47<br>(-0.77, 1.71)     | -0.69<br>(-1.45, 0.06)                 | -0.49<br>(-1.40, 0.43)                | 0.21<br>(-0.98, 1.39)     | 0.29<br>(-0.54, 1.12)                  | 0.55<br>(-0.49, 1.59)  | 0.26<br>(-1.06, 1.59)                 | 0.75  | 0.29   | 0.45    |
| MOBID-2 ≥3                | -0.71<br>(-1.44, 0.01)                  | <b>-1.29</b><br><b>(-2.24, -0.33)</b> | -0.57<br>(-1.77, 0.62)    | <b>-1.13</b><br><b>(-1.83, -0.42)</b>  | <b>-1.28</b><br><b>(-2.11, -0.45)</b> | -0.16<br>(-1.24, 0.93)    | 0.41<br>(-0.33, 1.15)                  | -0.01<br>(-0.97, 0.96) | -0.42<br>(-1.63, 0.79)                | 0.63  | 0.31   | 0.35    |
| MOBID-2 ≥3, Paracetamol   | -0.61<br>(-1.82, 0.61)                  | <b>-1.97</b><br><b>(-3.45, -0.48)</b> | -1.36<br>(-3.27, 0.55)    | -1.04<br>(-2.28, 0.20)                 | -0.96<br>(-2.20, 0.28)                | 0.07<br>(-1.67, 1.82)     | 0.43<br>(-0.77, 1.62)                  | -1.00<br>(-2.38, 0.38) | -1.43<br>(-3.25, 0.39)                | 0.24  | 0.13   | 0.38    |
| MOBID-2 ≥3, buprenorphine | -0.87<br>(-1.79, 0.04)                  | -0.65<br>(-1.90, 0.61)                | 0.23<br>(-1.32, 1.77)     | <b>-1.19</b><br><b>(-2.04, -0.34)</b>  | <b>-1.57</b><br><b>(-2.72, -0.42)</b> | -0.38<br>(-1.81, 1.05)    | 0.32<br>(-0.63, 1.26)                  | 0.92<br>(-0.43, 2.27)  | 0.60<br>(-1.04, 2.25)                 | 0.77  | 0.30   | 0.36    |

ICC NH, intraclass correlation on nursing home unit level; ICC pat, intraclass correlation on patient level; MMSE, Mini-Mental State Examination; MOBID-2, Mobilisation-Observation-Behaviour-Intensity-Dementia-2 Pain Scale; P-int, P for interaction, obtained by likelihood ratio test.
